# Supplementary material for: Validation of Surrogate Anthropometric Indices in Older Adults: What Is the Best Indicator of High Cardiometabolic Risk Factor Clustering?
Source: PubMed Central journal article supplement (PMC6723899; doi:10.3390/nu11081701), 2019-07-24
Supplement: nutrients-11-01701-s001.pdf [file nutrients-11-01701-s001.pdf]

Supplementary Table 1.

Area under curve for BMI, WHtR, BRI, ABSI and CI to detect cardiometabolic risk (without waist circumference) by sex.

|                             | BMI   |       | WHtR  |       | BRI   |       | ABSI  |       | C-Index |       |
|-----------------------------|-------|-------|-------|-------|-------|-------|-------|-------|---------|-------|
|                             | Men   | Women | Men   | Women | Men   | Women | Men   | Women | Men     | Women |
| <b>Area under curve</b>     | 0.55  | 0.52  | 0.54  | 0.53  | 0.54  | 0.53  | 0.50  | 0.52  | 0.55    | 0.52  |
| <b>P-value</b>              | 0.08  | 0.29  | 0.21  | 0.09  | 0.21  | 0.09  | 0.96  | 0.36  | 0.09    | 0.25  |
| <b>Optimal cut-off</b>      | 25.7  | 30.3  | 0.57  | 0.59  | 4.77  | 5.26  | 0.083 | 0.08  | 21.2    | 20.1  |
| <b>Youden index J</b>       | 0.13  | 0.05  | 0.09  | 0.08  | 0.10  | 0.08  | 0.10  | 0.05  | 0.09    | 0.07  |
| <b>Sensitivity (%)</b>      | 0.00  | 34.56 | 57.29 | 63.13 | 57.29 | 63.13 | 60.42 | 26.73 | 19.79   | 28.57 |
| <b>Specificity (%)</b>      | 100.0 | 71.32 | 52.60 | 45.05 | 52.80 | 44.98 | 49.80 | 78.60 | 90.20   | 78.72 |
| <b>(+) Likelihood ratio</b> | 1.28  | 1.19  | 1.17  | 1.14  | 1.21  | 1.15  | 1.16  | 1.19  | 1.41    | 1.34  |
| <b>(-) Likelihood ratio</b> | 0.74  | 0.92  | 0.86  | 0.82  | 0.81  | 0.82  | 0.84  | 0.94  | 0.89    | 0.91  |

BMI: Body Mass Index; WHtR: Waist-to-Height Ratio; BRI: Body Roundness Index; ABSI: A Body Shape Index; C-Index: Conicity Index.
